# Supplementary material for: Facile synthesis of SnS hollow nanoparticles via laser ablation followed by chemical etching
Source: Royal Society of Chemistry journal article supplement (doi:10.1039/c2ra21112b), 2012-01-01
Supplement: c2ra21112b.pdf [file c2ra21112b.pdf]

Supporting information for

# Facile synthesis of SnS hollow nanoparticles via laser ablation followed by chemical etching

*Ming-Yan Sun, Jing Yang, Tao Lin, Xi-Wen Du\**

School of Materials Science and Engineering, Tianjin University, Tianjin, 300072, P. R.  
China

E-mail: [xwdu@tju.edu.cn](mailto:xwdu@tju.edu.cn)

### 1. Fully sulphurized SnS nanoparticles.

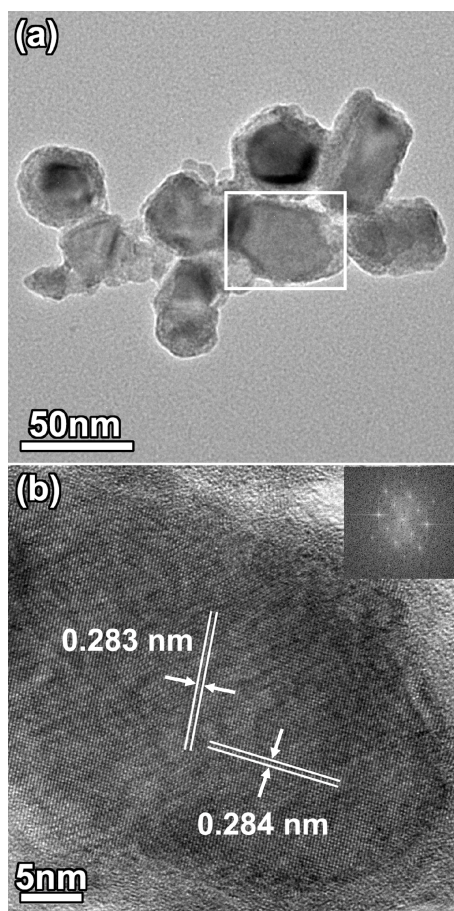

**Figure S1.** (a) TEM image of fully sulphurized SnS nanoparticles and (b) HRTEM image of a SnS nanoparticle shown in panel (a).

**2. The product after Sn@SnS core-shell nanoparticles being etched by different acids with pH value of 2.5~3.**

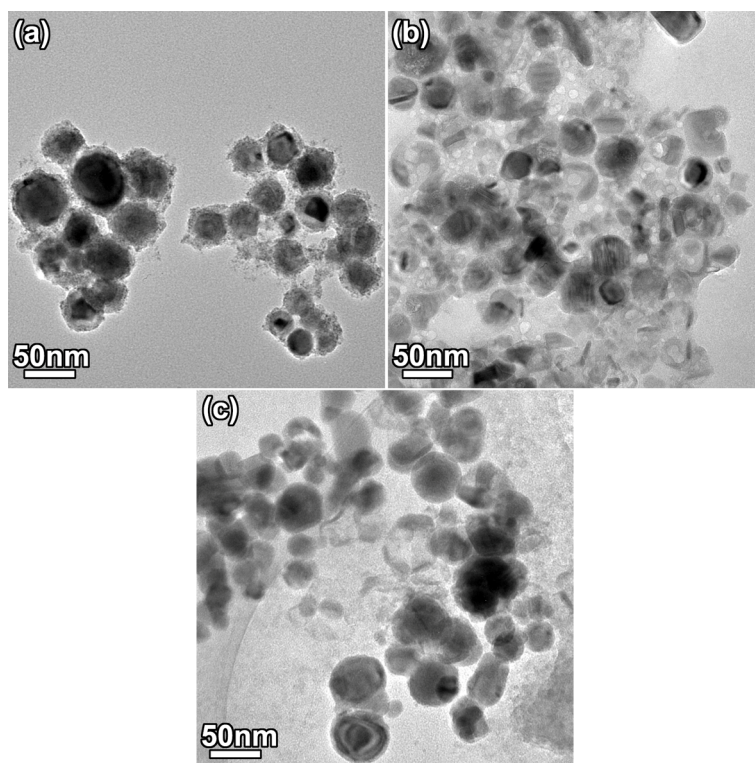

**Figure S2.** TEM images of the products after Sn@SnS core-shell nanoparticles being etched by (a) acetic acid, (b) phosphoric acid and (c) tartaric acid.

**3. The product after Sn@SnS core-shell nanoparticles being etched by high concentration HCl solution (pH=1~2).**

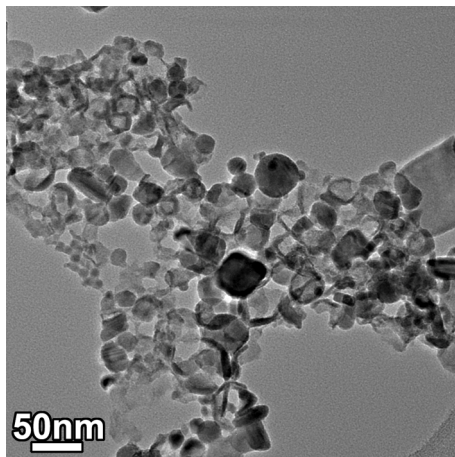

**Figure S3.** TEM images of the product after Sn@SnS core-shell nanoparticles being etched by high concentration HCl solution (pH=1~2).
